# Supplementary material for: 5-(3′,4′-Dihydroxyphenyl)-γ-valerolactone, a metabolite of procyanidins in cacao, suppresses MDI-induced adipogenesis by regulating cell cycle progression through direct inhibition of CDK2/cyclin O
Source: Royal Society of Chemistry journal article supplement (doi:10.1039/c9fo00334g), 2019-01-01

1 **Supplement Figure 1. Effects of DHPV blocked the G1 phase during mitotic clonal expansion.** Cells  
2 were harvested at the indicated time after the initiation of differentiation with or without DHPV treatment  
3 and stained with PI solution for flow cytometer cell cycle analysis. The histogram results indicate cell cycle  
4 distribution in G1, S or G2/M phases. Data were represented as mean  $\pm$  SEM values. Each experiment was  
5 repeated at least 3 times independently. To compare the differences among the groups, one-way ANOVA  
6 was used with Duncan's multiple range tests. Different letters indicated statistically significant differences at  
7  $p < 0.05$ .

8

9

# Supplement Fig. 1

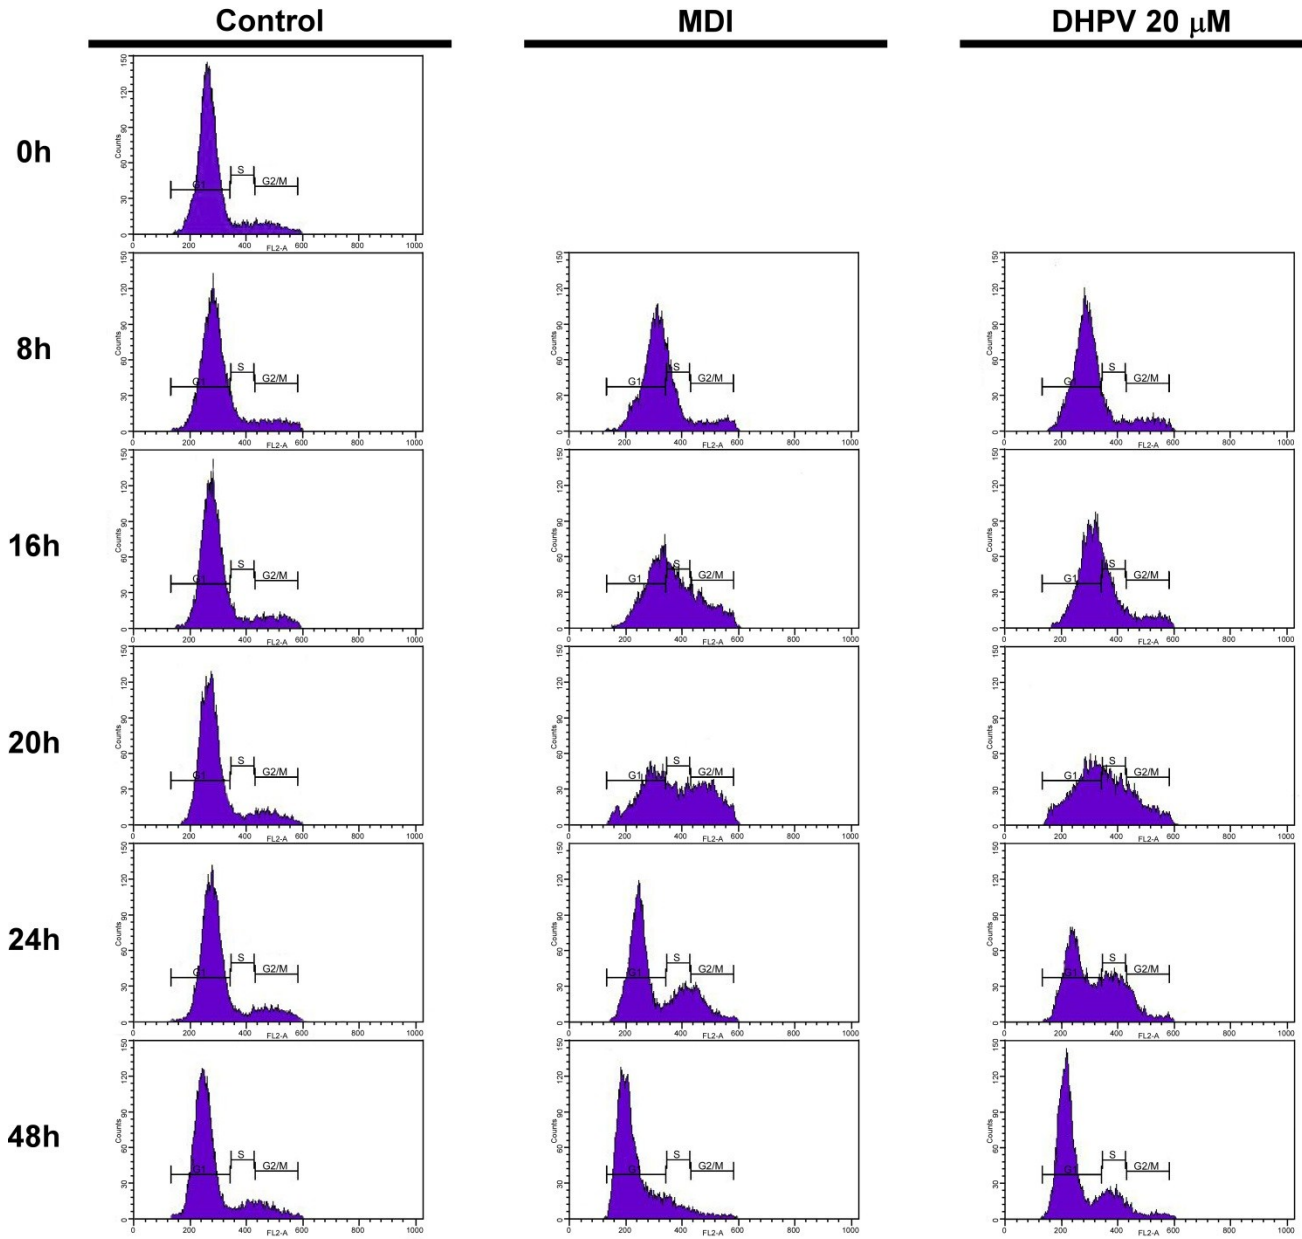

Supplement: c9fo00334g1.pdf [file c9fo00334g1.pdf]
